# Supplementary material for: Regulation of Gap Junction Dynamics by UNC-44/ankyrin and UNC-33/CRMP through VAB-8 in C. elegans Neurons
Source: PubMed Central journal article supplement (PMC4807823; doi:10.1371/journal.pgen.1005948), 2016-03-25

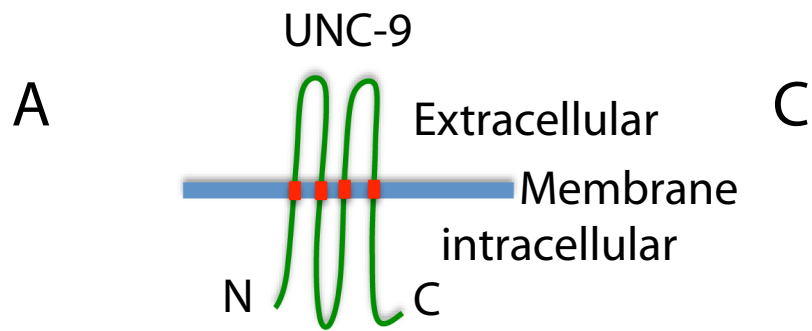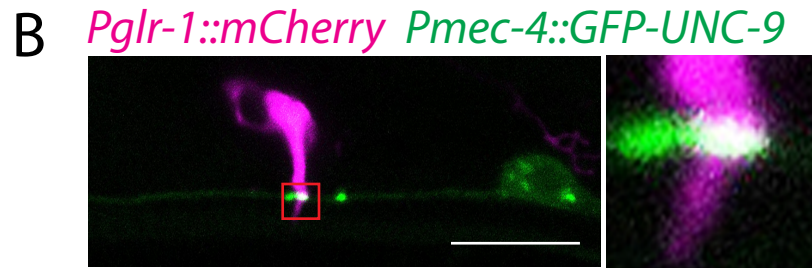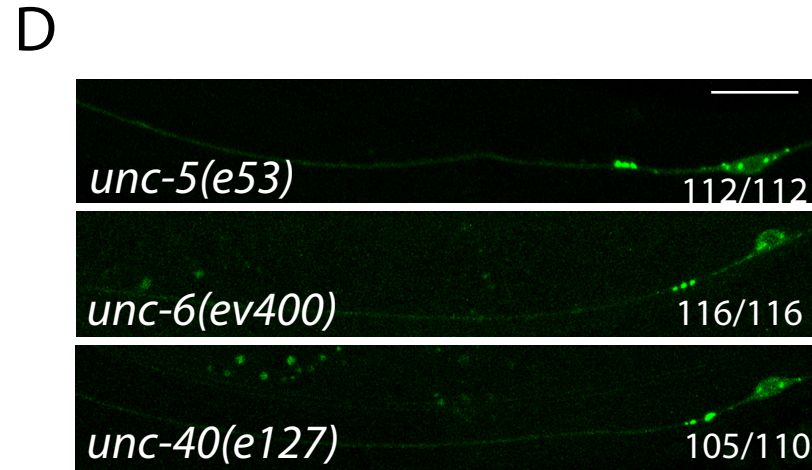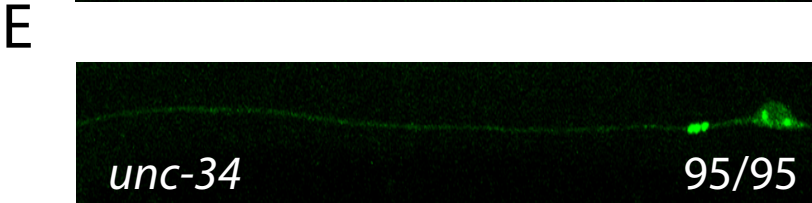

**C**

|       |     |                                                                |     |
|-------|-----|----------------------------------------------------------------|-----|
| UNC-7 | 120 | AMILYYLASAFRALYPRLLDDDFVDKLNYYTTTILASFALLVSAKQYVGFPIQC         | 179 |
|       |     | +M+LYY ASA +++ +DDD +DKLNYYTT I+ FA+LVS AKQYVGFPIQC            |     |
| UNC-9 | 2   | SMLLYFASAVKSIQFHVDDDIIDKLNYYTTAITVFAILVSAKQYVGFPIQC            | 61  |
|       |     | 191 173 55                                                     |     |
| UNC-7 | 180 | TDAMEQYTENYCWQNTYVWPQEDIPREIYSRRNRQIGYYQWPFILAIEALLFYVPCI      | 239 |
|       |     | T+ MEQYTENYCWQNTY++P+ + IP R NRQIGYYQWVPF+LA+EALLFYVP I        |     |
| UNC-9 | 62  | TEPMEQYTENYCWQNTYFLPLHDYIPHNVAERENRQIGYYQWVPFLALEALLFYVPTI     | 121 |
|       |     | 173                                                            |     |
| UNC-7 | 240 | LWRGLLYWHSGINLQGLVQMACDARLMDSEIKTRTVYTMARHMQDEVQLTINIDRQGHRS   | 299 |
|       |     | +WR LL W SGI++Q LVQMACD+RL+D E + R + T+A +++ + + + G +R        |     |
| UNC-9 | 122 | VWR-LLSWQSGIHVQSLVQMACDSRLDLESRRALQTIATNVEEALHVKHQVMSG-NRL     | 179 |
|       |     |                                                                |     |
| UNC-7 | 300 | CFSNLQLGANCGRHCGCVTMLYIGIKVLYSANVLLQFFLLNHLLGSNDLAYGFSLLKDL    | 359 |
|       |     | NL + C R G VT LYI +K+LY+ N++ Q FLLN LG+ YG +L DL               |     |
| UNC-9 | 180 | KLLNLII-- -CTRSSGAAVTFLYISVKILYTVNIVGQIFLLNTFLGNRSKWYGLQVLNDL  | 236 |
|       |     | 377 394                                                        |     |
| UNC-7 | 360 | MHAIEWEQTGMFPRVTLCDFEVRLVGNHRHTVQCVLMINMFNEKIFLFLWFWLTGCIV     | 419 |
|       |     | M+ EWE++G FPRVTLCDFEV+VLGN+HRHTVQCVLMINMFNEKIFLFLWFW+          |     |
| UNC-9 | 237 | MNGREWEESGHFPRVTLCDFEVKVLGNVHRHTVQCVLMINMFNEKIFLFLWFYFLLAGA    | 296 |
|       |     | 254 271                                                        |     |
| UNC-7 | 420 | TVCNTMYWILIMFIPSQGMSFVRKYLRLVDPHPAKPIADDVTLRKFTHNFRKDGVFMLR    | 479 |
|       |     | T+C+ YWI I +PS+ ++FV KYL + + + D +LR+F +FR+DGVF+LR             |     |
| UNC-9 | 297 | TLCSLFYWIYISVWPSRQLNFVGVKYLGTGIEGY-- -KMVDQSLSRRVFHFLRQDGVFLLR | 353 |
|       |     |                                                                |     |
| UNC-7 | 480 | MISTHAGELMSELILALWQDF 501                                      |     |
|       |     | M+THAGEL EL LW ++                                              |     |
| UNC-9 | 354 | MVATHAGELPCYELAKTLWNNY 375                                     |     |

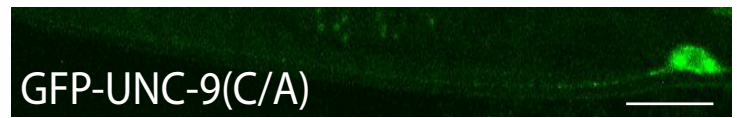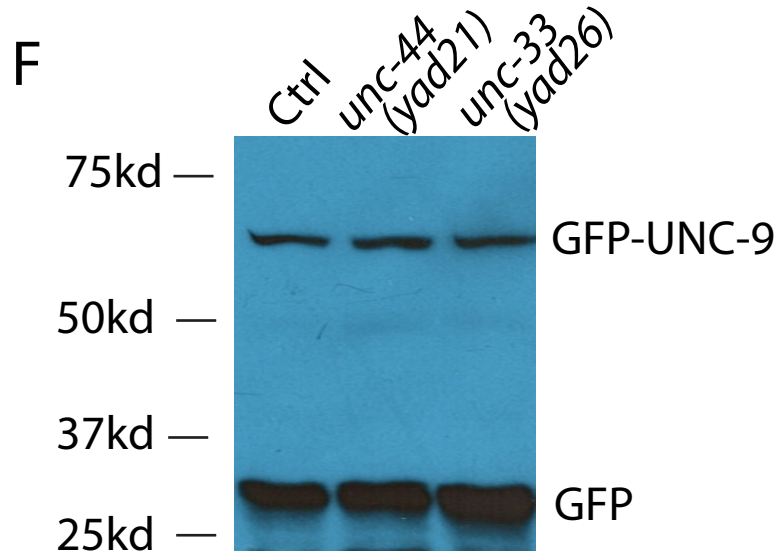

Supplement: pgen.1005948.s002.pdf [file pgen.1005948.s002.pdf]
