# Supplementary material for: Regulation of Gap Junction Dynamics by UNC-44/ankyrin and UNC-33/CRMP through VAB-8 in C. elegans Neurons
Source: PubMed Central journal article supplement (PMC4807823; doi:10.1371/journal.pgen.1005948), 2016-03-25

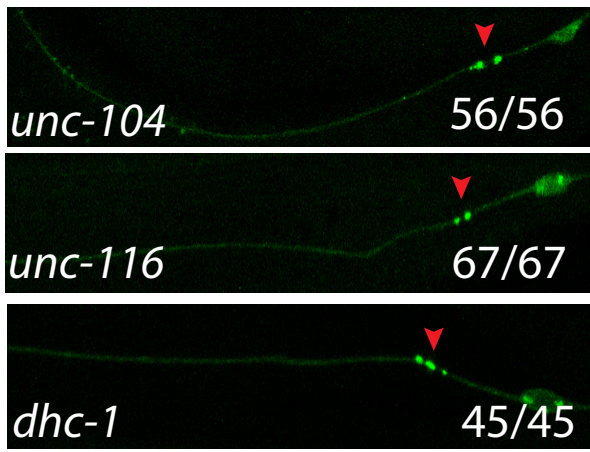

Supplement: pgen.1005948.s006.pdf [file pgen.1005948.s006.pdf]
